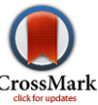

## Correction

# Correction: Matriptase Deletion Initiates a Sjögren's Syndrome-Like Disease in Mice

## The PLOS ONE Staff

There is an error in the "Conclusions" section of the "Abstract." The correct sentence for this section is:

"Our findings demonstrate that local impairment of epithelial barrier function can lead to loss of exocrine gland function in the absence of inflammation while systemic deletion can induce a primary Sjögren's syndrome like phenotype with autoimmunity and loss of gland function."

## Reference

1. Yin H, Kosa P, Liu X, Swaim WD, Lai Z, et al. (2014) Matriptase Deletion Initiates a Sjögren's Syndrome-Like Disease in Mice. PLoS ONE 9(2): e82852. doi:10.1371/journal.pone.0082852

---

**Citation:** The PLOS ONE Staff (2014) Correction: Matriptase Deletion Initiates a Sjögren's Syndrome-Like Disease in Mice. PLoS ONE 9(5): e98331. doi:10.1371/journal.pone.0098331

**Published:** May 20, 2014

**Copyright:** © 2014 The PLOS ONE Staff. This is an open-access article distributed under the terms of the Creative Commons Attribution License, which permits unrestricted use, distribution, and reproduction in any medium, provided the original author and source are credited.
